# Supplementary material for: Enterobacter sp. AA26 gut symbiont as a protein source for Mediterranean fruit fly mass-rearing and sterile insect technique applications
Source: PubMed Central journal article supplement (PMC6929400; doi:10.1186/s12866-019-1651-z), 2019-12-24

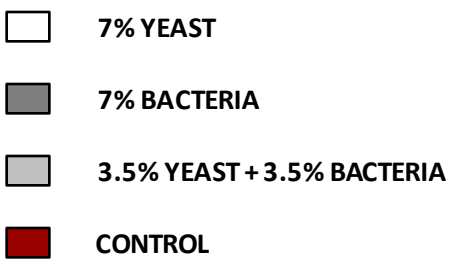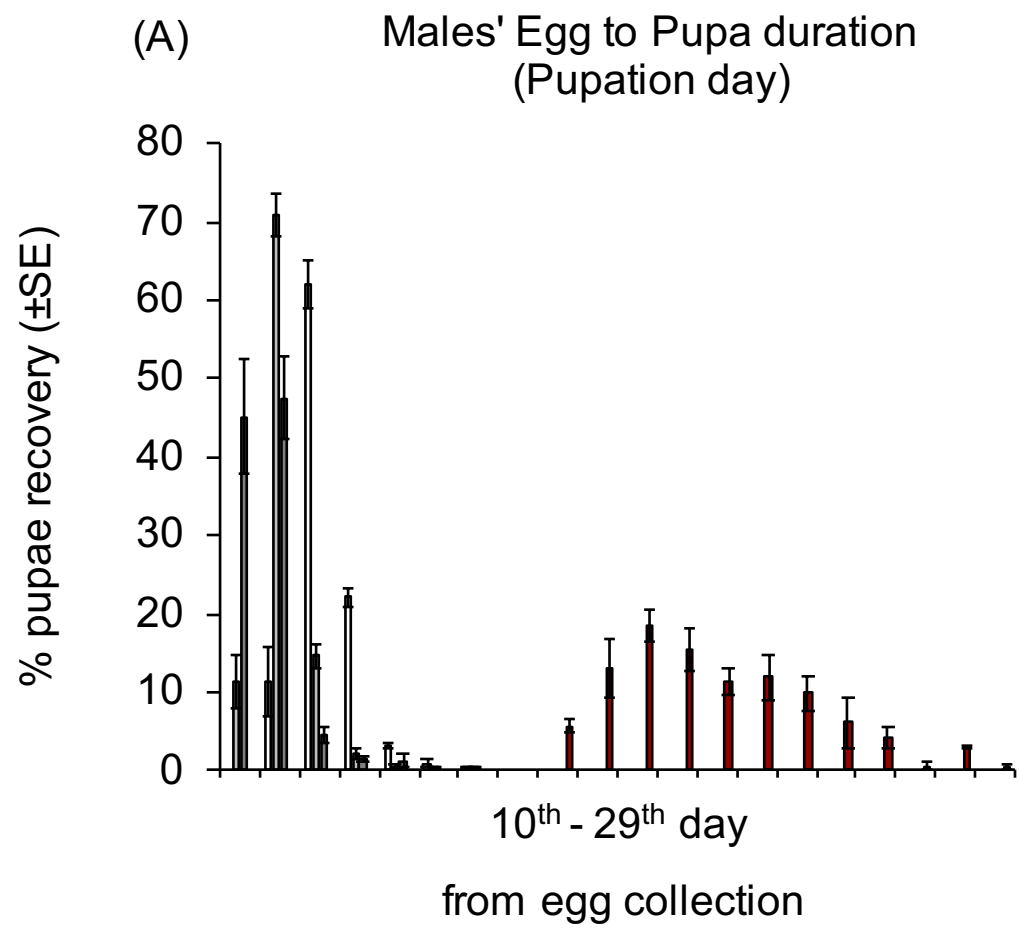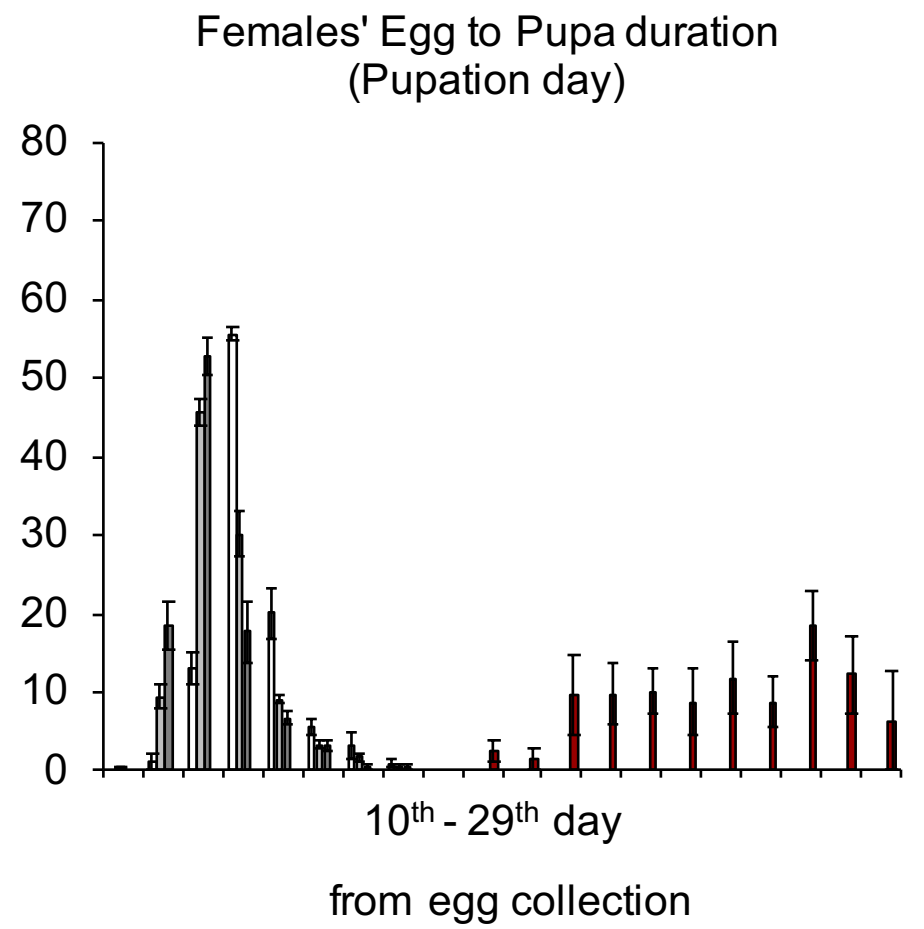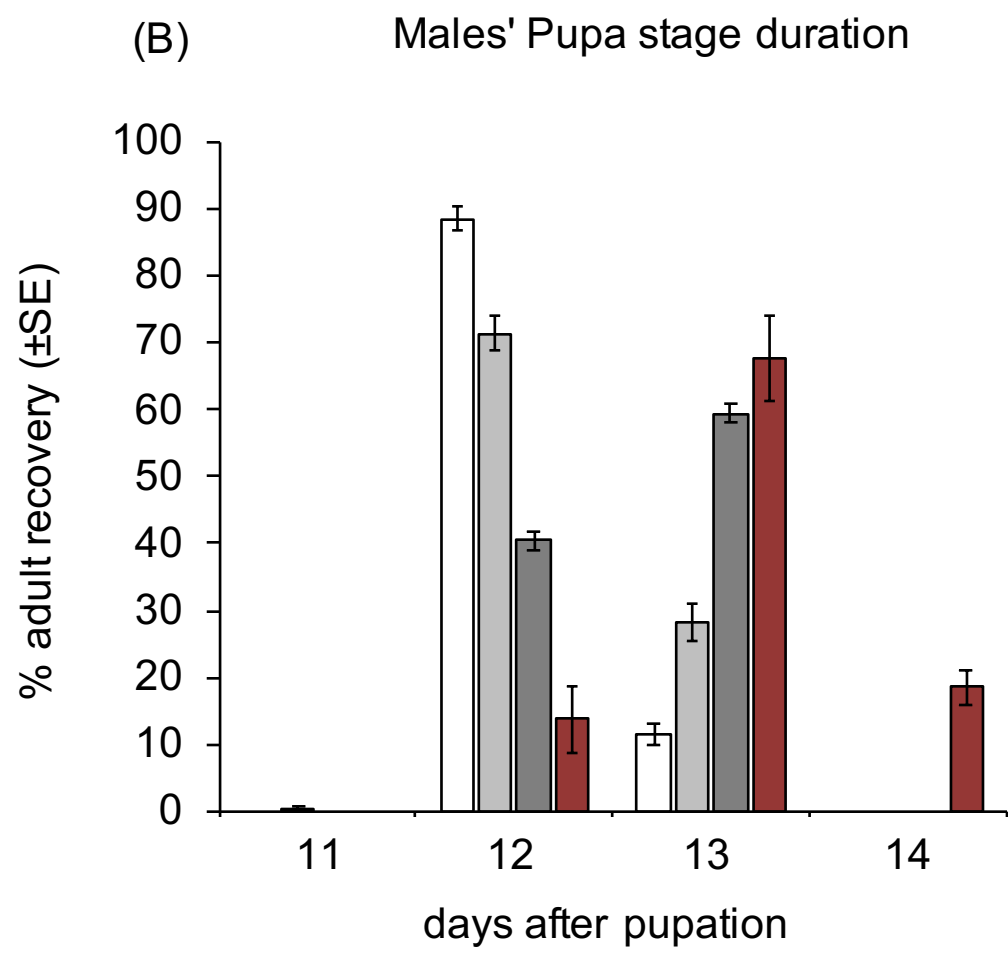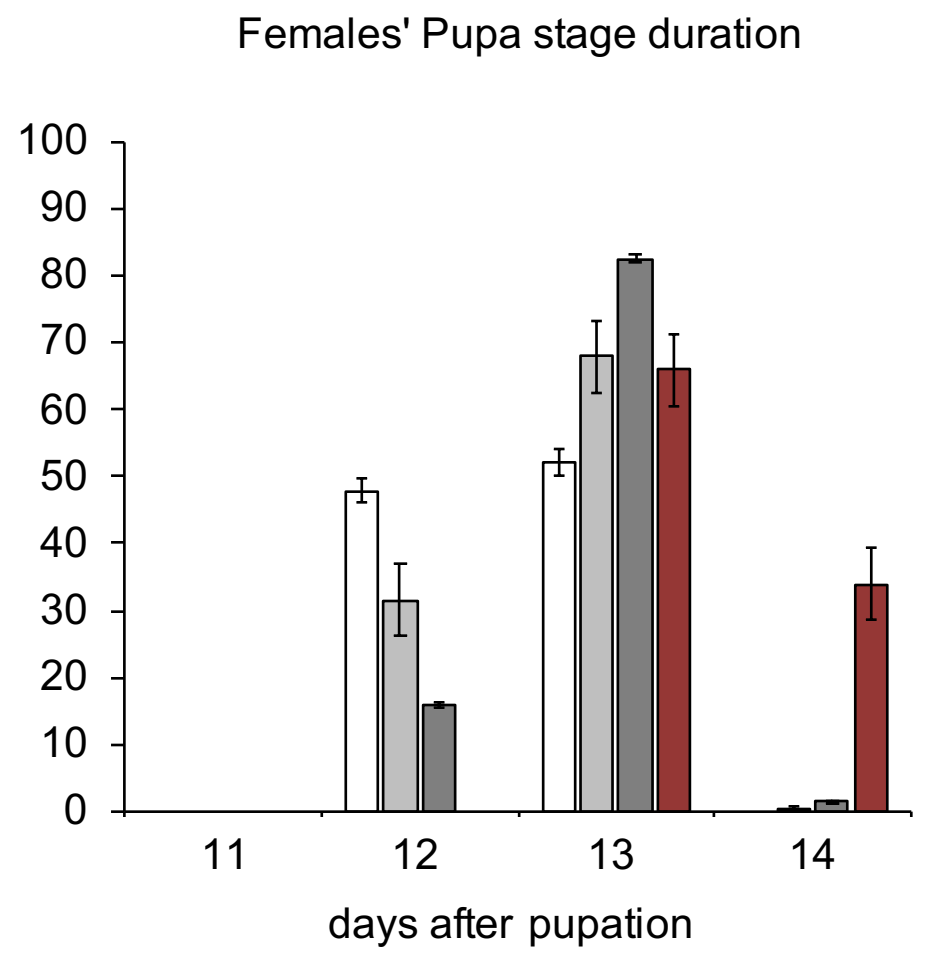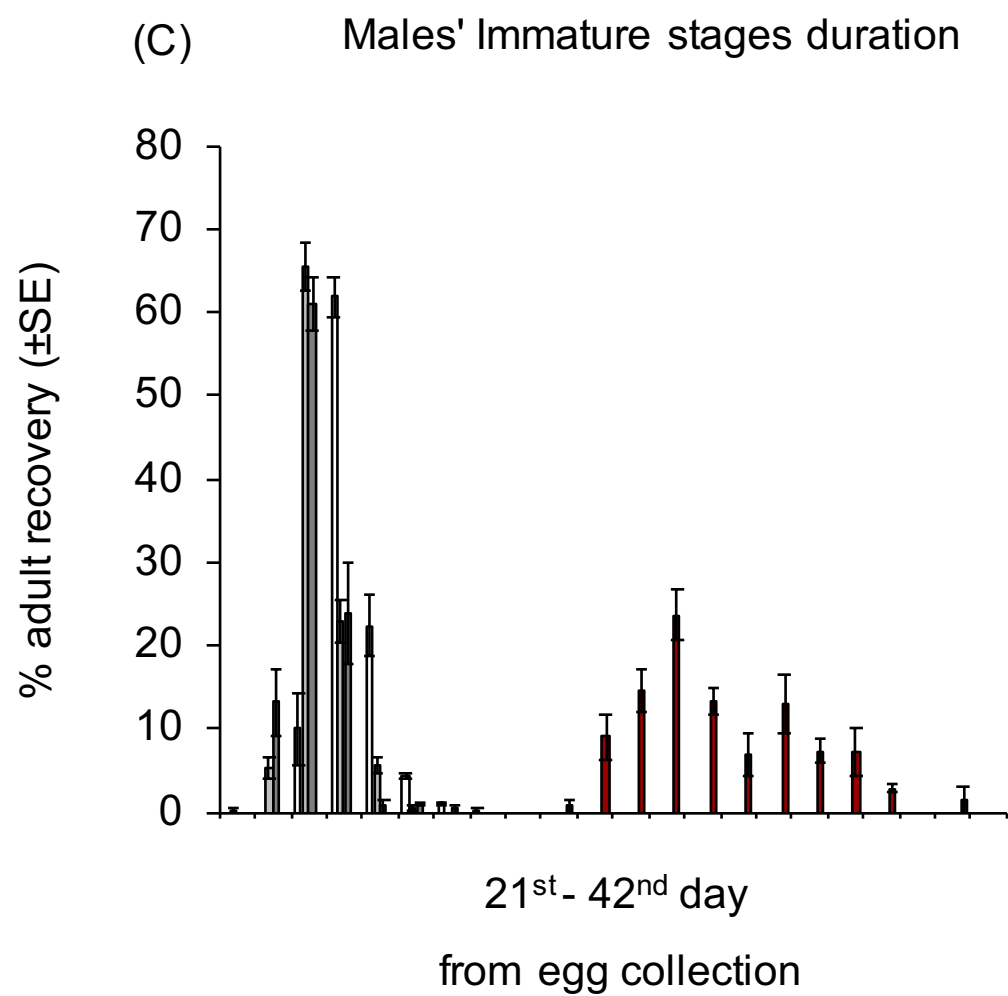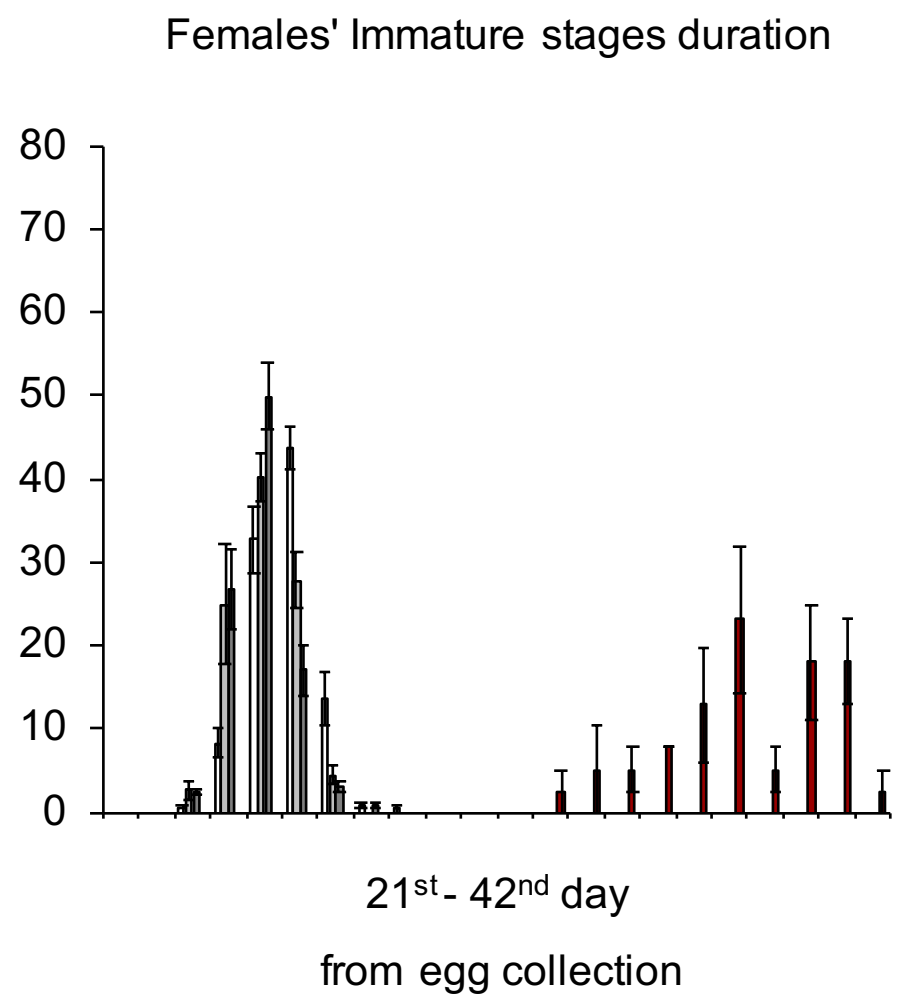

Supplement: 12866_2019_1651_MOESM1_ESM.pdf [file 12866_2019_1651_MOESM1_ESM.pdf]
